# Supplementary material for: Moonlighting chaperone activity of the enzyme PqsE contributes to RhlR-controlled virulence of Pseudomonas aeruginosa
Source: PubMed Central journal article supplement (PMC9715718; doi:10.1038/s41467-022-35030-w), 2022-12-01

## SUPPLEMENTARY INFORMATION

### **Moonlighting chaperone activity of the enzyme PqsE contributes to RhIR-controlled virulence of *Pseudomonas aeruginosa***

Sebastian Roman Borgert<sup>1,\*</sup>, Steffi Henke<sup>1,\*</sup>, Florian Witzgall<sup>1</sup>, Stefan Schmelz<sup>1</sup>, Susanne zur Lage<sup>1</sup>, Sven-Kevin Hotop<sup>2</sup>, Steffi Stephen<sup>2</sup>, Dennis Lübken<sup>3</sup>, Jonas Krüger<sup>4</sup>, Nicolas Oswaldo Gomez<sup>4</sup>, Marco van Ham<sup>5</sup>, Lothar Jänsch<sup>5</sup>, Markus Kalesse<sup>3</sup>, Andreas Pich<sup>6</sup>, Mark Brönstrup<sup>2</sup>, Susanne Häussler<sup>4</sup>, & Wulf Blankenfeldt<sup>1,7\*</sup>

<sup>1</sup>Department Structure and Function of Proteins, Helmholtz Centre for Infection Research, Inhoffenstr. 7, 38124 Braunschweig, Germany

<sup>2</sup>Department Chemical Biology, Helmholtz Centre for Infection Research, Inhoffenstr. 7, 38124 Braunschweig, Germany

<sup>3</sup>Institute of Organic Chemistry, Leibniz University Hannover, Schneiderberg 1B, 30167 Hannover, Germany

<sup>4</sup>Department Molecular Bacteriology, Helmholtz Centre for Infection Research, Inhoffenstr. 7, 38124 Braunschweig, Germany

<sup>5</sup>Cellular Proteomics, Helmholtz Centre for Infection Research, Inhoffenstr. 7, 38124 Braunschweig, Germany

<sup>6</sup>Institute for Toxicology, Core Facility Proteomics, Hannover Medical School, Carl-Neuberg-Str. 1, 30625 Hannover, Germany

<sup>7</sup>Institute for Biochemistry, Biotechnology and Bioinformatics, Technische Universität Braunschweig, Spielmannstr. 7, 38106 Braunschweig, Germany

\*These authors contributed equally: Sebastian Roman Borgert, Steffi Henke

Email: wulf.blankenfeldt@helmholtz-hzi.de

SUPPLEMENTARY FIGURES

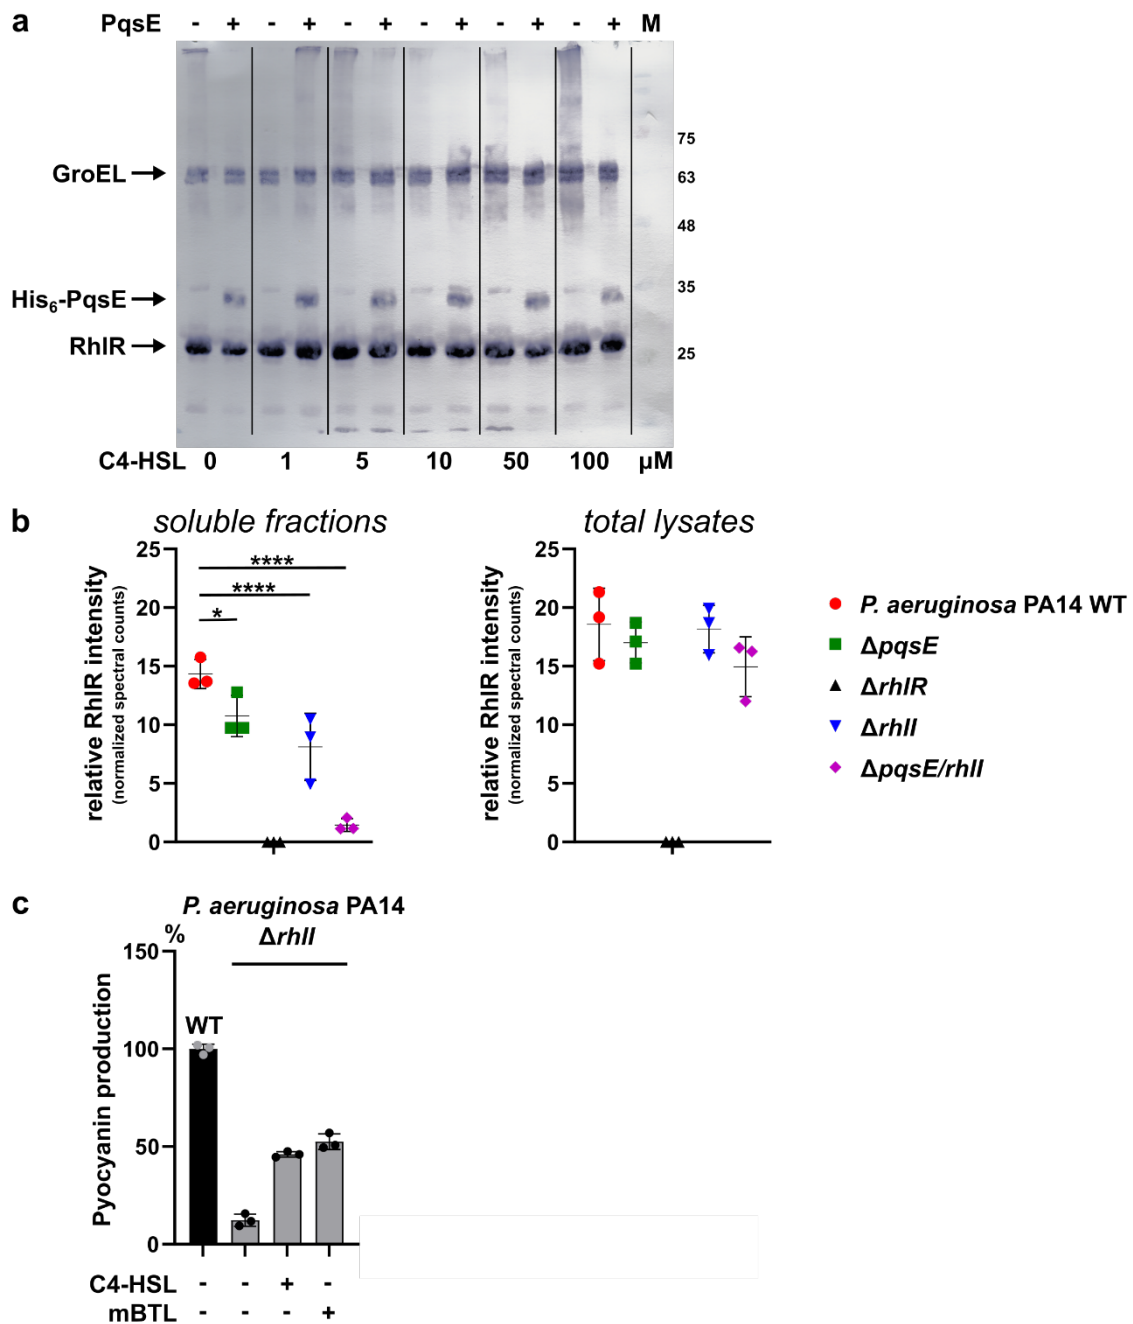

**Supplementary Fig. 1 | Impact of C4-HSL, mBTL and PqsE on RhIR and RhIR-mediated pyocyanin production.** **a** Western blot of whole-cell extracts from *E. coli* BL21-CodonPlus(DE3)-RIL overproducing RhIR in the presence of the indicated amounts of C4-HSL and in the presence or absence of simultaneous PqsE-overexpression. The marker (M) indicates the molecular weight in kDa. The total amount of RhIR is not influenced by C4-HSL or PqsE, but the soluble fraction increases with C4-HSL and PqsE (Fig. 2a). **b** Abundance of RhIR in *P. aeruginosa* PA14 and mutants unable to produce RhIR, PqsE and/or RhII. Dot plots demonstrate that PqsE and RhII (C4-HSL autoinducer synthase) together increase the amount of soluble RhIR (left), whereas the total amount of RhIR in whole-cell extracts is constant. Relative protein abundances are given in normalized spectral counts as calculated by using the ID\_STAT@COMPARE plug-in in PaSER Version 2022c. Statistics: Two-sided Student's t-test: \* =  $p < 0.05$  ( $p = 0.0449$ ), \*\*\*\* =  $p < 0.0001$ . Mean values with error bars indicating the standard deviation of three independent measurements are shown. **c** C4-HSL and mBTL lead to similar levels of pyocyanin production in a  $\Delta rhII$  mutant of *P. aeruginosa* PA14. C4-HSL and mBTL

were applied at a concentration of 50  $\mu\text{M}$ . Mean values with error bars indicating the standard deviation of three independent measurements are shown.

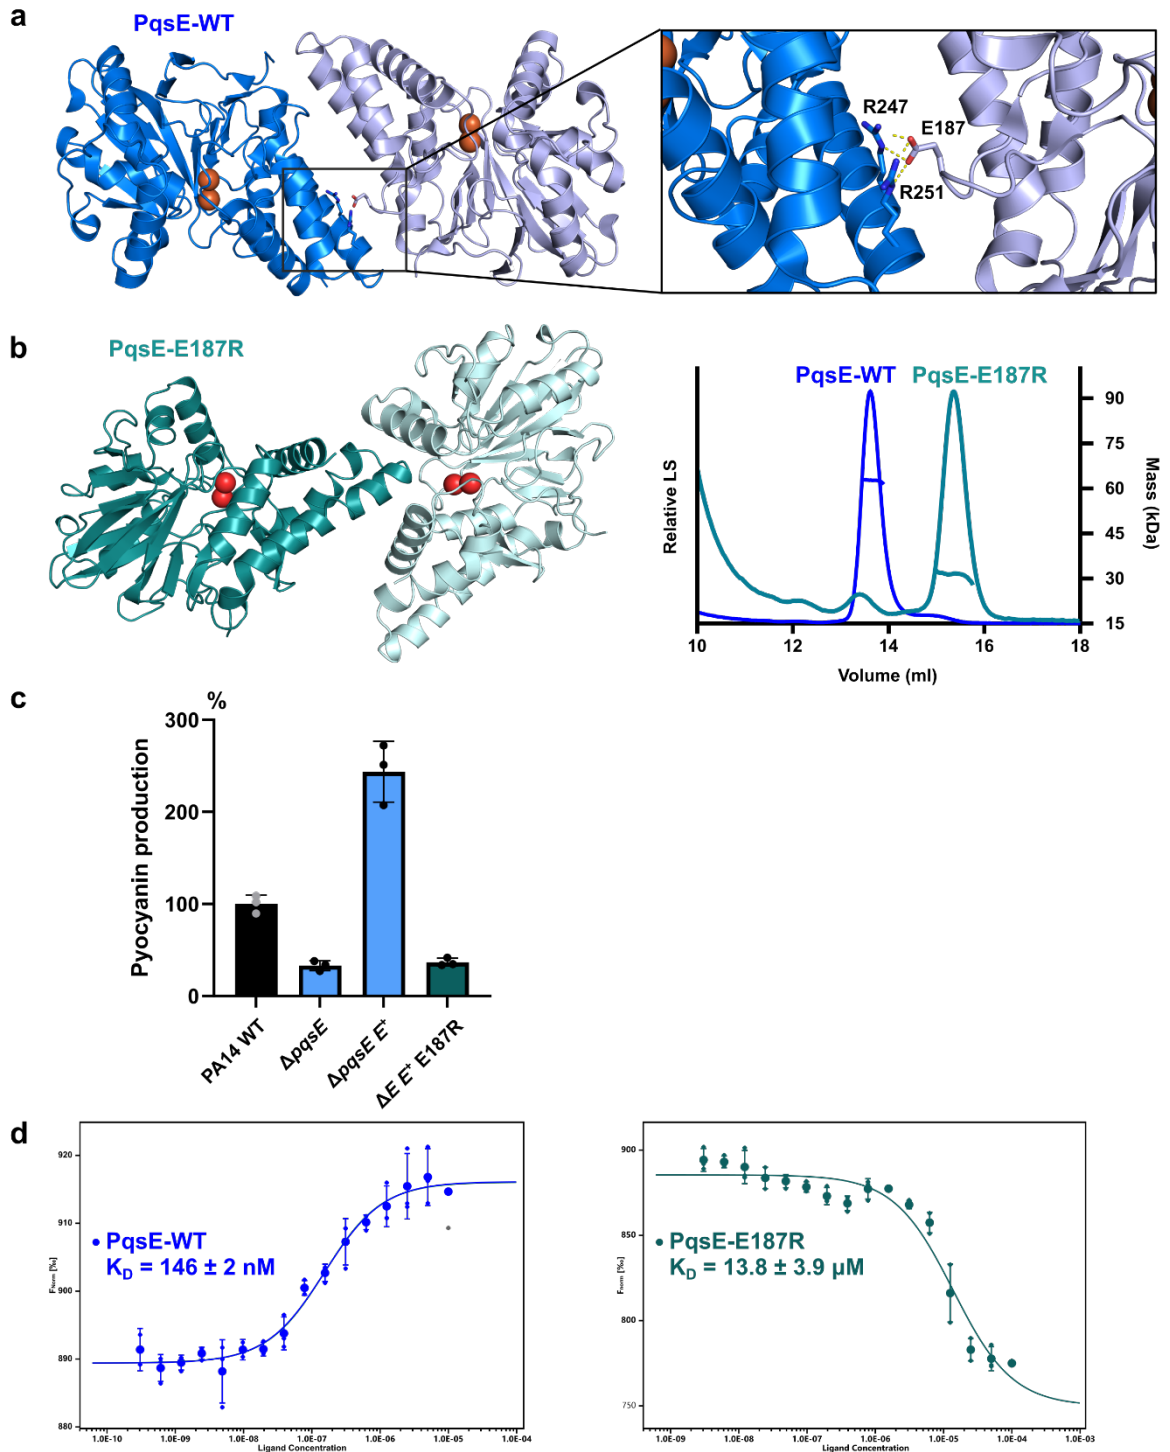

**Supplementary Fig. 2 | Dimerization of PqsE impacts on interaction with RhIR and control of the PqsE/RhIR regulon. a** Dimers are observed in all crystal structures of WT-PqsE (exemplified with PDB entry 2Q0I<sup>19</sup>). Dimerization involves interactions of E187 with R247 and R251. **b** Mutation of E187 to arginine leads to monomer formation, as demonstrated by crystal structure and SEC-MALS analysis. **c** Monomeric PqsE-E187R does not restore pyocyanin production in a  $\Delta pqsE$ -mutant of *P. aeruginosa* PA14. Mean values with error bars indicating the standard deviation of three independent measurements are shown. **d** Microscale thermophoresis of PqsE with ATTO488-labeled RhIR:mBTL, revealing a  $K_D$  of  $146 \pm 2$  nM (left), whereas the interaction was approx. 100-fold weaker in similar experiments with PqsE-E187R ( $K_D = 13.8 \pm 3.9$   $\mu$ M, right). Mean values with error bars indicating the standard deviation of three independent measurements are shown. Note that PqsE-E187R yielded an inverse titration curve with respect to WT-PqsE.

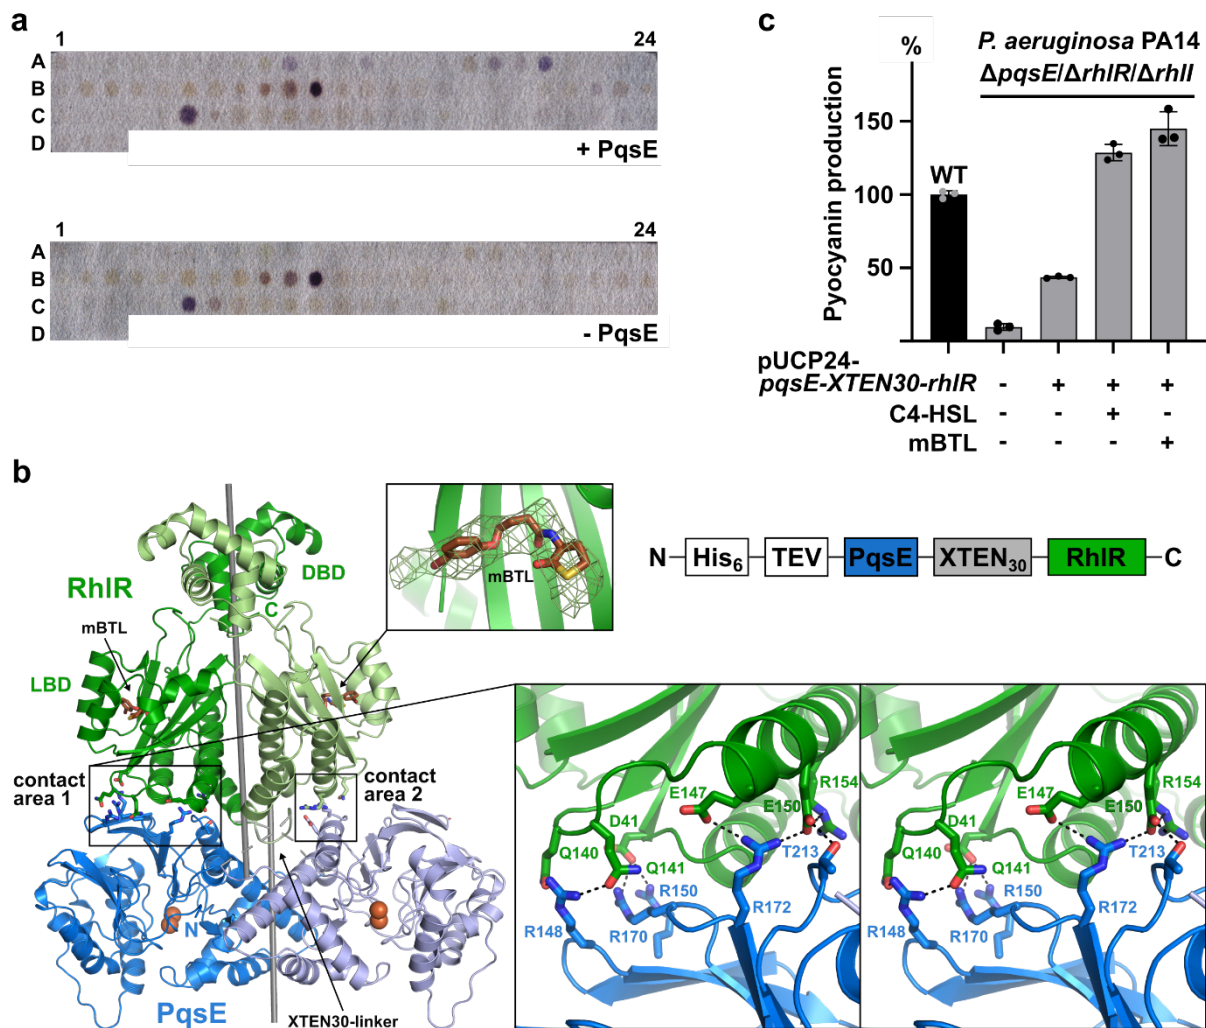

**Supplementary Fig. 3 | Towards structural details of the PqsE/RhIR interaction.** **a** Peptide SPOT array of 21-mer peptides from RhIR, covering the protein sequence in three-residue steps. Peptide sequences are reported in supplementary Tab. 9. The array was incubated with His<sub>6</sub>-tagged PqsE and stained with an AP-conjugated anti-His<sub>6</sub> antibody and BCIP. Several specific interactions of PqsE with RhIR-derived peptides can be discerned (upper panel), despite high background found in the negative control (lower panel). **b** A PqsE-XTEN30-RhIR fusion protein was constructed (schematic overview: upper right; TEV denotes a cleavage site for Tobacco Etch Virus protease) and crystallized in the presence of mBTL. The smaller magnified insert shows  $|F_o - F_c|$  electron density in the ligand binding domain of PqsE-XTEN30-RhIR at 3  $\sigma$  before incorporating mBTL in the refinement. The larger magnified area shows a cross-eyed stereo plot of polar interactions in the larger contact area between RhIR and PqsE. DBD and LBD denote the DNA- and ligand-binding domains of RhIR, the two-fold symmetry axes of RhIR and PqsE are shown as sticks (calculated with draw\_rotation\_axis.py in PyMOL<sup>56</sup>). **c** PqsE-XTEN30-RhIR emulates the regulatory interplay of RhIR and PqsE in pyocyanin production as shown in a *P. aeruginosa* PA14  $\Delta rhIR/rhII/pqsE$  triple mutant supplemented with a pUCP24 plasmid encoding the fusion protein. Note that C4-HSL and mBTL stimulate pyocyanin production to similar levels. Mean values with error bars indicating the standard deviation of three independent measurements are shown.

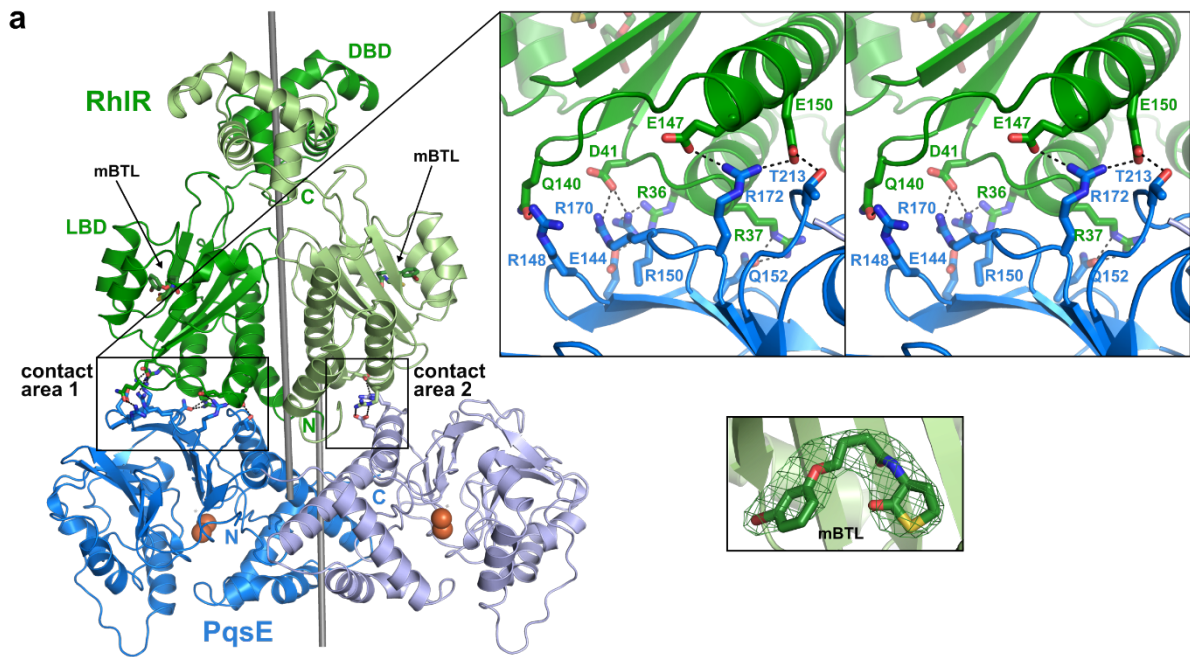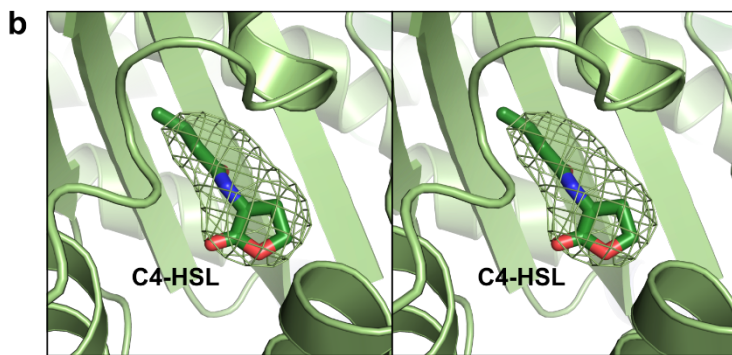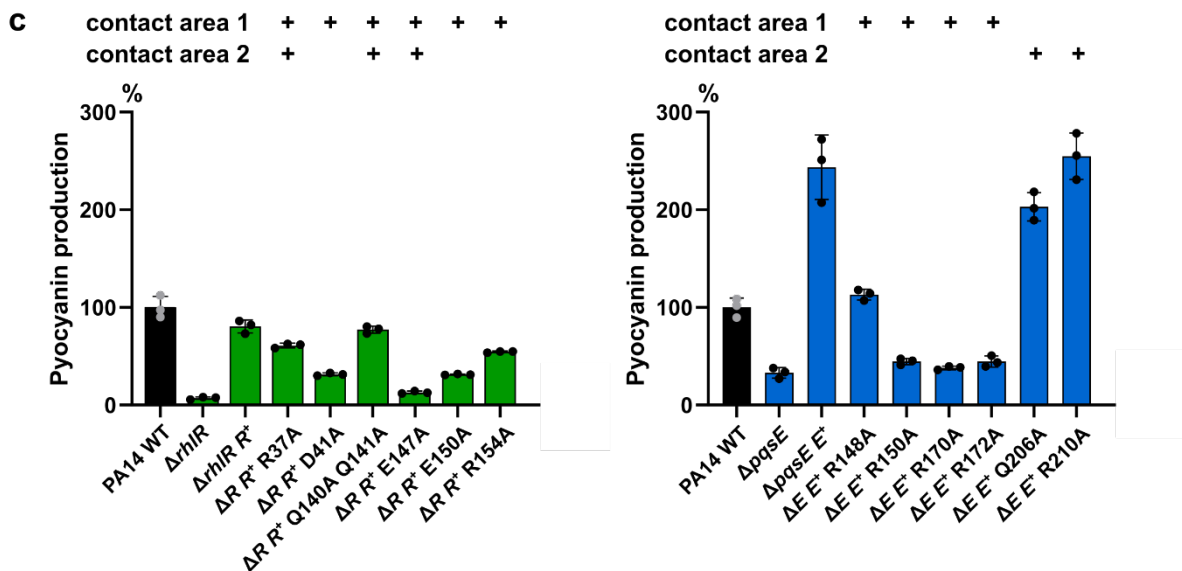

**Supplementary Fig. 4 | Details of the PqsE/RhIR complex structure.** a Crystal structure of the PqsE/RhIR:mBTL complex. DBD and LBD denote the DNA- and ligand-binding domains of RhIR, the two-fold symmetry axes of RhIR and PqsE are shown as sticks (calculated with draw\_rotation\_axis.py in PyMOL<sup>56</sup>). Red spheres represent two iron atoms bound to the active center of PqsE. The smaller magnified insert shows  $|F_o - F_c|$  electron density in the ligand binding domain at  $3\sigma$  before

incorporating mBTL in the refinement. The larger magnified area shows a cross-eyed stereo plot of polar interactions in the larger contact area between RhIR and PqsE. DBD and LBD denote the DNA- and ligand-binding domains of RhIR. **b** Cross-eyed stereo plot of  $|F_o - F_c|$  electron density at  $2.5 \sigma$  in the ligand binding domain of the PqsE/RhIR:C4-HSL complex before incorporating the ligand in the refinement. More structural details of this structure are shown in Fig. 3a. **c** Mutagenesis reveals the importance of residues in the larger contact area 1 of the PqsE/RhIR complex for pyocyanin production in *P. aeruginosa* PA14. Contact areas have been analyzed with PISA<sup>57</sup>. Note that contact areas 1 and 2 overlap for RhIR but not for PqsE. Mean values with error bars indicating the standard deviation of three independent measurements are shown.

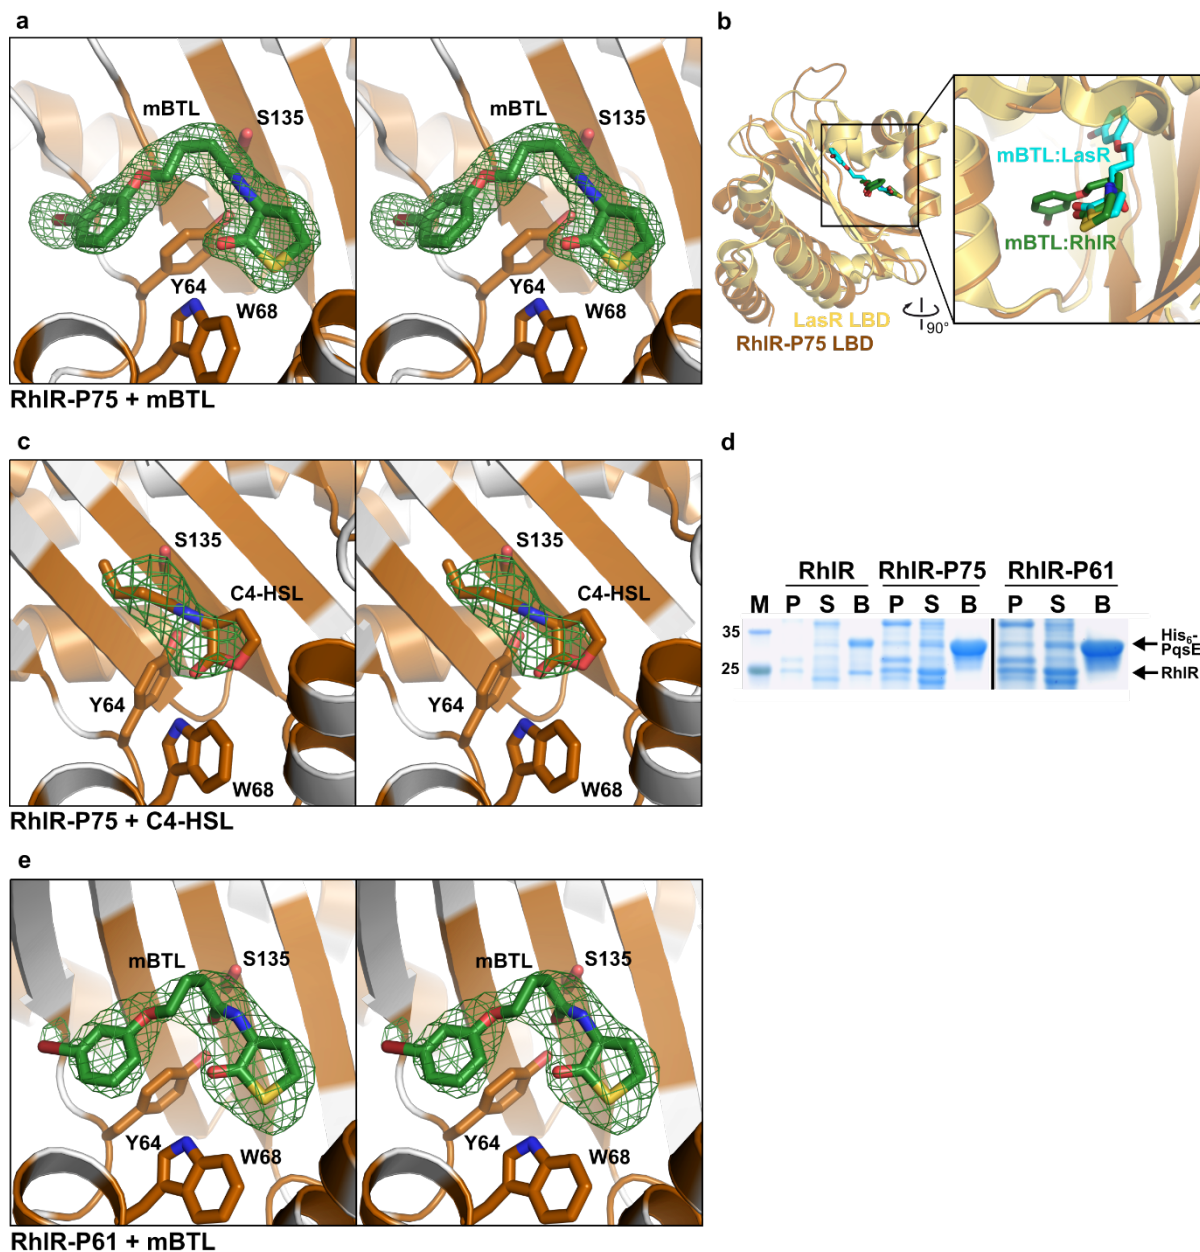

**Supplementary Fig. 5 | Details of crystal structures of RhIR-P75 in complex with mBTL or C4-HSL. a**  $|F_o - F_c|$  electron density at  $3\sigma$  in the ligand binding domain RhIR-P75 crystallized in the presence of mBTL before incorporating the ligand in the refinement. **b** Overlay of the LBD of RhIR-P75 with the LBD of LasR (PDB entry 6MWL<sup>44</sup>) reveals different conformations of mBTL. **c**  $|F_o - F_c|$  electron density at  $2\sigma$  in the ligand binding domain RhIR-P75 crystallized in the presence of C4-HSL before incorporating the ligand in the refinement. **d** RhIR-P75 and RhIR-P61 do not interact with PqsE. SDS-PAGE gel of a co-expression analysis of His<sub>6</sub>-tagged PqsE and RhIR-WT, RhIR-P75 or RhIR-P61 in *E. coli* BL21-CodonPlus(DE3)-RIL in the presence of 50  $\mu$ M C4-HSL. Induced cells were harvested, lysed and separated into an insoluble (P) and a soluble fraction (S), which was used to incubate Ni-NTA beads, washed and then boiled in SDS-loading buffer (B). A typical result from at least three independent experiments is shown. The marker (M) indicates the molecular weight in kDa. **e**  $|F_o - F_c|$  electron density at  $3\sigma$  in the ligand binding domain RhIR-P61 crystallized in the presence of mBTL before incorporating the ligand in the refinement.



**SUPPLEMENTARY TABLES**

**Supplementary Tab. 1: Oligonucleotides used in this study**

| <b>Oligonucleotide</b> | <b>Sequence 5' → 3'</b>                                                                    | <b>Purpose</b>                                                                 |
|------------------------|--------------------------------------------------------------------------------------------|--------------------------------------------------------------------------------|
| PrM_036_XTEN30-F       | ACACCAGAATCAGGTCCAGGGACG<br>AGCACTGAACCTTCTGAAGGATCG<br>GCACCAATGAGGAATGACGGAGG<br>CTTTTGG | Forward PCR Primer to introduce a 30 residue XTEN-Linker between PqsE and RhIR |
| PrM_037_XTEN30-R       | CCTGATTCTGGTGTGCGGACTCGC<br>TTGTTCTGGTGTCTCACTTCCAGA<br>GTCCAGAGGCAGCGCCTG                 | Reverse PCR Primer to introduce a 30 residue XTEN-Linker between PqsE and RhIR |
| PrM_044_R150A-F        | CGGCATGCACTGCAGGTCATAGAG<br>GCCC                                                           | Forward SDM Primer to introduce R150A Substitution in PqsE                     |
| PrM_045_R150A-R        | CTGCAGTGCATGCCGCGGTCCCAG                                                                   | Reverse SDM Primer to introduce R150A Substitution in PqsE                     |
| PrM_046-R170A-F        | GACGTGGCAGCCGCCCTGTTC<br>TG                                                                | Forward SDM Primer to introduce R170A Substitution in PqsE                     |
| PrM_047-R170A-R        | GCGGCGTGCCACGTCGTAGAAAAC<br>CACG                                                           | Reverse SDM Primer to introduce R170 Substitution in PqsE                      |
| PrM_048-R172A-F        | CGACGTGCCCCGCTGTTCTGCGGC                                                                   | Forward SDM Primer to introduce R172A Substitution in PqsE                     |
| PrM_049-R172A-R        | CAGGCGGGCACGTGCGACGTCGTA<br>GAAAACC                                                        | Reverse SDM Primer to introduce R172A Substitution in PqsE                     |
| PrM_050-E206A-F        | TCCCTGGCACGTCTGCAGCGTCTGC                                                                  | Forward SDM Primer to introduce E206A Substitution in PqsE                     |
| PrM_051-E206A-R        | CAGACGTGCCAGGGACTCCAGGTA<br>AGCC                                                           | Reverse SDM Primer to introduce E206A Substitution in PqsE                     |
| PrM_052-Q209A-F        | CGTCTGGCACGTCTGCCGACCCTGC                                                                  | Forward SDM Primer to introduce Q209A Substitution in PqsE                     |
| PrM_053-Q209A-R        | CAGACGTGCCAGACGTTCCAGGGA<br>CTCC                                                           | Reverse SDM Primer to introduce Q209A Substitution in PqsE                     |
| PrM_054-R210A-F        | CTGCAGGCACTGCCGACCCTGCTG<br>C                                                              | Forward SDM Primer to introduce R210A Substitution in PqsE                     |
| PrM_055-R210A-R        | CGGCAGTGCCTGCAGACGTTCCAG<br>GGAC                                                           | Reverse SDM Primer to introduce R210A Substitution in PqsE                     |
| PrM_058-R148A-F        | CCGGCACATCGCCTGCAGGTCATA<br>GAG                                                            | Forward SDM Primer to introduce R148A Substitution in PqsE                     |

|                      |                                                       |                                                                                  |
|----------------------|-------------------------------------------------------|----------------------------------------------------------------------------------|
| PrM_059-R148A-R      | CAGGCGATGTGCCGGTCCCAGCTC<br>CAGCC                     | Reverse SDM Primer to introduce R148A Substitution in PqsE                       |
| Pr029_PqsE-Duet_F    | CTTTAAGAAGGAGATATACCATGG<br>GCCATCATCATCATCA          | Forward Primer to amplify pqsE sequence                                          |
| Pr030_PqsE-Duet_R    | TACGATTACTTTCTGTTTCGATCAGT<br>CCAGAGGCAGCG            | Reverse Primer to amplify pqsE sequence                                          |
| Pr031_Duet_Frag_F    | TCGAACAGAAAGTAATCGTATTGT<br>ACACG                     | Forward Primer to amplify the region between the two MCS in pET-Duet-1 sequence  |
| Pr032_Duet_Frag_R    | ATGTATATCTCCTTCTTATACTTAAC<br>TAATATACTAAGATGGGGAATTG | Reverse Primer to amplify the region between the two MCS in pET-Duet-1 sequence  |
| Pr033_RhIR_F         | TATAAGAAGGAGATATACATATGA<br>GGAATGACGGAGGCTTTT        | Forward Primer to amplify rhIR sequence                                          |
| Pr034_RhIR_R         | TTTACCAGACTCGAGGGTACTCAG<br>ATGAGACCCAGCGCC           | Reverse Primer to amplify rhIR sequence                                          |
| Pr039_RhIR_500-F     | CGGGGATCCTCTAGAGTCGACGCA<br>GCGCGCCTACGC              | Forward Primer to amplify the 500 bp upstream region of rhIR                     |
| Pr041-RhIR-Prom-R    | CATTGCAGTAAGCCCTGATCGATAA<br>AATGCATC                 | Reverse Primer to amplify the 500 bp upstream region of rhIR                     |
| Pr042-RhIR-F         | ATCGATCAGGGCTTACTGCAATGA<br>GGAATGACGGAGGCTTTTTG      | Forward Primer to amplify the rhIR sequence for cloning in pUCP24m               |
| Pr036_His_RhIR_R     | ACGACGGCCAGTGCCAAGCTTCAG<br>ATGAGACCCAGCGCC           | Reverse Primer to amplify the rhIR sequence for cloning in pUCP24m               |
| Pr043-RhIR-75-F      | GATCAGGGCTTACTGCAATGCGCA<br>ACGATGGCGGCTTTT           | Forward Primer to amplify the rhIR-PROSS mutant sequences for cloning in pUCP24m |
| Pr038_His_RhIR_P75_R | AAACGACGGCCAGTGCCAAGCTTA<br>AATCAGGCCAGCGCCG          | Reverse Primer to amplify the rhIR-PROSS mutant sequences for cloning in pUCP24m |
| PqsE_E187R_for       | GGGCGAGTTCGACGAGGCACGTG<br>G GGTGTGGCGGCCGCTGG        | Forward QuikChange Primer to introduce the named mutations into PqsE             |
| PqsE_E187R_rev       | CCAGCGGCCGCCACACCCAC<br>GTGCCTCGTGAAGTCCGCCC          | Reverse QuikChange Primer to introduce the named mutations into PqsE             |
| RhIRwt_PstI          | AAACTGCAGTCCAACCCGGTCTGCC<br>TGA                      | Forward PCR Primer to amplify RhIR WT DBD with PstI restriction site             |
| RhIRwt_KpnI_rv       | AAAGGTACCTCAGATGAGACCCAG<br>CGCCGC                    | Reverse PCR Primer to amplify RhIR WT DBD with KpnI restriction site             |

|                       |                                               |                                                                                |
|-----------------------|-----------------------------------------------|--------------------------------------------------------------------------------|
| RP75_S173MQ175M_fw    | CGAACTGAACCATCCGATGCTGAT<br>GTCCAACCCGGTCTGCC | Forward QuikChange Primer<br>to introduce the named<br>mutations into RhIR-P75 |
| RP75_S173MQ175M_rv    | GGCAGACCGGGTTGGACATCAGCA<br>TCGGATGGTTCAGTTCC | Reverse QuikChange Primer<br>to introduce the named<br>mutations into RhIR-P75 |
| RhIR_WT_R37A_fw       | GGAAAAGGAAGTGCGGGCCCTGG<br>GCTTCGATTAC        | Forward QuikChange Primer<br>to introduce the named<br>mutation into RhIR WT   |
| RhIR_WT_R37A_rv       | GTAATCGAAGCCCAGGGCCCGCAC<br>TTCCTTTTCC        | Reverse QuikChange Primer<br>to introduce the named<br>mutation into RhIR WT   |
| RhIR_WT_D41A_fw       | GCGCCTGGGCTTCGCTTACTACGCC<br>TATG             | Forward QuikChange Primer<br>to introduce the named<br>mutation into RhIR WT   |
| RhIR_WT_D41A_rv       | CATAGGCGTAGTAAGCGAAGCCCA<br>GGCGC             | Reverse QuikChange Primer<br>to introduce the named<br>mutation into RhIR WT   |
| RhIR_WT_E147A_fw      | CATCTCCAGCTTCGCGCGGAGGA<br>AATCC              | Forward QuikChange Primer<br>to introduce the named<br>mutation into RhIR WT   |
| RhIR_WT_E147A_rv      | GGATTTCTCGCGCGCAAGCTGG<br>AGATG               | Reverse QuikChange Primer<br>to introduce the named<br>mutation into RhIR WT   |
| RhIR_WT_E150A_fw      | TCGAGCGCGAGGCAATCCGCCTGC<br>G                 | Forward QuikChange Primer<br>to introduce the named<br>mutation into RhIR WT   |
| RhIR_WT_E150A_rv      | CGCAGGCGGATTGCCTCGCGCTCG<br>A                 | Reverse QuikChange Primer<br>to introduce the named<br>mutation into RhIR WT   |
| RhIR_WT_R36A_fw       | TGGAAAAGGAAGTGGCGCGCCTG<br>GGCTTCG            | Forward QuikChange Primer<br>to introduce the named<br>mutation into RhIR WT   |
| RhIR_WT_R36A_rv       | CGAAGCCCAGGCGGCCACTTCCTT<br>TTCCA             | Reverse QuikChange Primer<br>to introduce the named<br>mutation into RhIR WT   |
| RhIR_WT_Q140AQ141A_fw | TTTCCGTGGCGCGGACGCGGCGA<br>ACATCTCCAGCTTCG    | Forward QuikChange Primer<br>to introduce the named<br>mutations into RhIR WT  |
| RhIR_WT_Q140AQ141A_rv | CGAAGCTGGAGATGTTCCGCCGCGT<br>CGCGCGCCACGGAAA  | Reverse QuikChange Primer<br>to introduce the named<br>mutations into RhIR WT  |
| RWT_R154A_fw          | GAGGAAATCCGCCTGGCGCTGCGT<br>TGCATGA           | Forward QuikChange Primer<br>to introduce the named<br>mutation into RhIR WT   |
| RWT_R154A_rv          | TCATGCAACGCAGCGCCAGGCGGA<br>TTTCCTC           | Reverse QuikChange Primer<br>to introduce the named<br>mutation into RhIR WT   |
| <i>pqsE</i> _up_F     | CGAATTCGGCGAGAGTCTCGAAGA<br>CG                | Forward PCR primer for the<br>amplification of upstream                        |

|                   |                                                   |                                                                                                                         |
|-------------------|---------------------------------------------------|-------------------------------------------------------------------------------------------------------------------------|
|                   |                                                   | <i>pqsE</i> sequence (EcoRI site underlined)                                                                            |
| <i>pqsE_up_R</i>  | CAGAGGCAGCGAAAGCCTCAACAT<br>GGC                   | Reverse PCR primer for the amplification of upstream <i>pqsE</i> sequence                                               |
| <i>pqsE_dw_F</i>  | AGGCTTTCGCTGCCTCTGGACTGA<br>GGC                   | Forward PCR primer for the amplification of downstream <i>pqsE</i> sequence                                             |
| <i>pqsE_dw_R</i>  | <u>CGGATCCCTGCGACTCTTCTGGG</u><br>G               | Reverse PCR primer for the amplification of downstream <i>pqsE</i> sequence (BamHI site underlined)                     |
| <i>pqsE_F</i>     | CAACCTGTCGATCCTGCTCG                              | Forward primer for the verification of the <i>pqsE</i> deletion                                                         |
| <i>pqsE_R</i>     | CAGGCTGGACAGGCCATG                                | Reverse primer for the verification of the <i>pqsE</i> deletion                                                         |
| <i>rhIR_Up_F</i>  | TAT <u>GCGGCCGCTGCAGCGCCTA</u><br>CGCG            | Forward PCR primer for the amplification of upstream <i>rhIR</i> sequence (NotI site underlined)                        |
| <i>rhIR_Up_R</i>  | TCAGTCAGTCAGCTAGCTGCAGTA<br>AGCCCTGATCGATAAAATGCA | Reverse PCR primer for the amplification of upstream <i>rhIR</i> sequence (NheI site underlined)                        |
| <i>rhIR_Dw_F</i>  | <u>GCTAGCTGACTGACTGAAGCGCAG</u><br>GGCGCGCCG      | Forward PCR primer for the amplification of upstream <i>rhIR</i> sequence (NheI site underlined)                        |
| <i>rhIR_Dw_R</i>  | TATA <u>AAGCTTGGCGGCGTAGCGCGA</u><br>AAGC         | Reverse PCR primer for the amplification of downstream <i>rhIR</i> sequence (HindIII site underlined)                   |
| <i>rhIR_F</i>     | CTGTCGGCGTTTCATGGAATTG                            | Forward primer for the verification of the <i>rhIR</i> deletion                                                         |
| <i>rhIR_R</i>     | AAGACTTGATGCCGGTAGCGTC                            | Reverse primer for the verification of the <i>rhIR</i> deletion                                                         |
| Sp_ <i>rhII_F</i> | gcgcgCGAATTGCTCTCTGAATCGC                         | Sense-oriented oligonucleotide to construct the specific <i>rhII</i> spacer (protruding end indicated in lowercase)     |
| Sp_ <i>rhII_R</i> | aaacGCGATTCAGAGAGCAATTCGc                         | Antisense-oriented oligonucleotide to construct the specific <i>rhII</i> spacer (protruding end indicated in lowercase) |

|                      |                                                                                                                                |                                                                                                                                    |
|----------------------|--------------------------------------------------------------------------------------------------------------------------------|------------------------------------------------------------------------------------------------------------------------------------|
| <i>rhII</i> _ssDNA_R | CATGCGGCAGGAGAAGCGGAAAA<br>AAGTGC GCGAAACGGCTGACGACC<br><b>TCACAT</b> GACCAAGTCCCCGTGTCGT<br>GCCGGCCGAGAAAAAAAAAGGCGG<br>CATCC | Recombineering mutagenic oligonucleotide to generate the clean deletion of <i>rhII</i> (Start codon bold and Stop codon in italic) |
| <i>rhII</i> _F       | TCCTCCTTTAGTCTTCCCCC                                                                                                           | Forward primer for the verification of the <i>rhII</i> deletion                                                                    |
| <i>rhII</i> _R       | GAGAGACTACGCAAGTCGGC                                                                                                           | Reverse primer for the verification of the <i>rhII</i> deletion                                                                    |

Primers were ordered from either Eurofins Genomics or Sigma Aldrich.

**Supplementary Tab. 2: Plasmids used in this study**

| Plasmid                      | Features / Function                                                                                                    | Supplier / Source                |
|------------------------------|------------------------------------------------------------------------------------------------------------------------|----------------------------------|
| pET-Duet-1                   |                                                                                                                        | Novagen                          |
| pUCP24m                      | pUCP24 Vector with an introduced stop codon in the lacZ $\alpha$ -peptide                                              | kindly provided by Prof. D. Jahn |
| pUCP24m His-PqsE WT          | pUCP24m derivative encoding the sequence for PqsE with a N-terminal His-Tag                                            | this study                       |
| pUCP24m His-PqsE-R148A       | pUCP24m derivative encoding the sequence for PqsE-R148A with a N-terminal His-Tag                                      | this study                       |
| pUCP24m His-PqsE-R150A       | pUCP24m derivative encoding the sequence for PqsE-R150A with a N-terminal His-Tag                                      | this study                       |
| pUCP24m His-PqsE-R170A       | pUCP24m derivative encoding the sequence for PqsE-R170A with a N-terminal His-Tag                                      | this study                       |
| pUCP24m His-PqsE-R172A       | pUCP24m derivative encoding the sequence for PqsE-R172A with a N-terminal His-Tag                                      | this study                       |
| pUCP24m His-PqsE-E187R       | pUCP24m derivative encoding the sequence for PqsE-E187R with a N-terminal His-Tag                                      | this study                       |
| pUCP24m His-PqsE-E206A       | pUCP24m derivative encoding the sequence for PqsE-E206A with a N-terminal His-Tag                                      | this study                       |
| pUCP24m His-PqsE-Q209A       | pUCP24m derivative encoding the sequence for PqsE-Q209A with a N-terminal His-Tag                                      | this study                       |
| pUCP24m His-PqsE-R210A       | pUCP24m derivative encoding the sequence for PqsE-R210A with a N-terminal His-Tag                                      | this study                       |
| pUCP24m His-PqsE-XTEN30-RhIR | pUCP24m derivative encoding the sequence for PqsE and RhIR linked by a 30 residue XTEN Linker and a N-terminal His-Tag | this study                       |
| pUCP24m prhIR RhIR WT        | pUCP24m derivative encoding the wildtype RhIR sequence and 500 bp of the region upstream of RhIR                       | this study                       |
| pUCP24m prhIR RhIR R37A      | pUCP24m derivative encoding the RhIR-R37A sequence and 500 bp of the region upstream of RhIR                           | this study                       |
| pUCP24m prhIR RhIR D41A      | pUCP24m derivative encoding the RhIR-D41A sequence and 500 bp of the region upstream of RhIR                           | this study                       |
| pUCP24m prhIR RhIR E147A     | pUCP24m derivative encoding the RhIR-E147A sequence and                                                                | this study                       |

|                                         |                                                                                                                                            |                                 |
|-----------------------------------------|--------------------------------------------------------------------------------------------------------------------------------------------|---------------------------------|
|                                         | 500 bp of the region upstream of RhIR                                                                                                      |                                 |
| pUCP24m prhIR RhIR E150A                | pUCP24m derivative encoding the RhIR-E150A sequence and 500 bp of the region upstream of RhIR                                              | this study                      |
| pUCP24m prhIR RhIR R154A                | pUCP24m derivative encoding the RhIR-R154A sequence and 500 bp of the region upstream of RhIR                                              | this study                      |
| pUCP24m prhIR RhIR Q140A Q141A          | pUCP24m derivative encoding the RhIR-Q140A Q141A sequence and 500 bp of the region upstream of RhIR                                        | this study                      |
| pUCP24m prhIR RhIR P61                  | pUCP24m derivative encoding the RhIR-P61 sequence and 500 bp of the region upstream of RhIR                                                | this study                      |
| pVP008 Strep-TEV-RhIR-P75               | pCOLA Duet (Novagen) derivative with TEV protease cleavage site, RhIR-P75 cloned between NotI/KpnI restriction sites                       | this study                      |
| pVP008 Strep-TEV-RhIR P61               | pCOLA Duet (Novagen) derivative with TEV protease cleavage site, RhIR-P61 cloned between NotI/KpnI restriction sites                       | this study                      |
| pET19m His <sub>6</sub> -TEV-PqsE       | pET19b (Novagen) derivative with TEV protease cleavage site and sequence encoding for PqsE                                                 | Zender and Witzgall et al. 2016 |
| pET19m His <sub>6</sub> -TEV-PqsE-E187R | pET19b (Novagen) derivative with TEV protease cleavage site and sequence encoding for PqsE-E187R                                           | this study                      |
| pET-Duet-1 His-TEV-PqsE x RhIR          | pET-Duet-1 (Novagen) derivative with TEV protease cleavage site and sequence encoding for PqsE (MCS1) and RhIR (MCS2)                      | this study                      |
| pET-Duet-1 His-TEV-PqsE-XTEN30-RhIR     | pET-Duet-1 (Novagen) derivative with TEV protease cleavage site and sequence encoding for PqsE and RhIR linked by a 30 residue XTEN linker | this study                      |
| pET26b RhIR WT                          | Expression vector for untagged RhIR WT, RhIR-encoding sequence cloned between NdeI/XhoI restriction sites                                  | this study                      |
| pET19m His <sub>6</sub> -TEV-RhIR WT    | pET19b (Novagen) derivative with TEV protease cleavage site and sequence encoding for RhIR                                                 | this study                      |

|                        |                                                                                                          |                          |
|------------------------|----------------------------------------------------------------------------------------------------------|--------------------------|
| pS448•CsR              | Sm <sup>R</sup> , <i>oriV pRO1600/ColE1, oriT, xylS, Pm</i> cas9, <i>P<sub>EM7</sub></i> sgRNA           | Seupt et al.             |
| pSEVA624- <i>ssr</i>   | Gm <sup>R</sup> , pSEVA624 cloned with the <i>ssr</i> recombinase sequence                               | Seupt et al.             |
| pEX-pqsE               | Gene replacement vector for PA14 <i>pqsE</i> , Amp <sup>R</sup>                                          | This study               |
| pEX18Ap2- <i>rhIR</i>  | Gene replacement vector for PA14 <i>rhIR</i> containing a FRT-Gm cassette, Amp <sup>R</sup>              | This study               |
| pFLP3                  | FLP expression vector, <i>sacB</i> *, <i>oriT</i> <sup>+</sup> , Ap <sup>R</sup> Tet <sup>R</sup>        | Choi, Gaynor et al. 2005 |
| pS448•CsR- <i>rhII</i> | Sm <sup>R</sup> , derivative of pS448•CsR carrying a <i>P<sub>EM7</sub></i> <i>rhII</i> -targeting sgRNA | This study               |

**Supplementary Tab. 3: Strains used in this study**

| Strain                                                                                  | Features / Genotype                                                                                                                                                                                                                                        | Supplier / Source                   |
|-----------------------------------------------------------------------------------------|------------------------------------------------------------------------------------------------------------------------------------------------------------------------------------------------------------------------------------------------------------|-------------------------------------|
| <i>Escherichia coli</i> Omnimax 2                                                       | F' { <i>proAB lacI</i> <sup>q</sup> <i>lacZ</i> ΔM15 <i>Tn10</i> (Tet <sup>R</sup> ) Δ( <i>ccdAB</i> )} <i>mcrA</i> Δ( <i>mrr hsdRMS-mcrBC</i> ) Φ80( <i>lacZ</i> )ΔM15 Δ( <i>lacZYA-argF</i> )U169 <i>endA1 recA1 supE44 thi-1 gyrA96 relA1 tonA panD</i> | Invitrogen                          |
| <i>Escherichia coli</i> BL21 Codon+ RIL                                                 | F' <i>ompT hsdS</i> ( <i>rB- mB -</i> ) <i>dcm+ Tet<sup>R</sup> gal λ(DE3) endA Hte [argU ileY leuW Cam<sup>R</sup>]</i>                                                                                                                                   | Agilent                             |
| <i>Pseudomonas aeruginosa</i> PA14                                                      | Wildtype                                                                                                                                                                                                                                                   | Liberati, Urbach <i>et al.</i> 2006 |
| <i>Pseudomonas aeruginosa</i> PA14 Δ <i>rhIR</i>                                        | Knockout strain Δ <i>rhIR</i>                                                                                                                                                                                                                              | Seupt <i>et al.</i>                 |
| <i>Pseudomonas aeruginosa</i> PA14 Δ <i>pqsE</i>                                        | Knockout strain Δ <i>pqsE</i>                                                                                                                                                                                                                              | This study                          |
| <i>Pseudomonas aeruginosa</i> PA14 Δ <i>pqsE</i> Δ <i>rhIR</i>                          | Knockout strain Δ <i>pqsE</i> Δ <i>rhIR</i>                                                                                                                                                                                                                | This study                          |
| <i>Pseudomonas aeruginosa</i> PA14 Δ <i>rhII</i>                                        | Knockout strain Δ <i>rhII</i>                                                                                                                                                                                                                              | This Study                          |
| <i>Pseudomonas aeruginosa</i> PA14 Δ <i>pqsE</i> Δ <i>rhII</i> Δ <i>rhIR</i>            | Knockout strain Δ <i>pqsE</i> Δ <i>rhII</i> Δ <i>rhIR</i>                                                                                                                                                                                                  | This study                          |
| <i>Pseudomonas aeruginosa</i> PA14 <i>tnpqsE</i> pUCP20::His <sub>6</sub> - <i>pqsE</i> | Transposon insertion in <i>pqsE</i> transformed with pUCP20::His <sub>6</sub> - <i>pqsE</i>                                                                                                                                                                | This study                          |
| <i>Pseudomonas aeruginosa</i> PA14 Δ20700ΩGm pUCP20::His <sub>6</sub> - <i>flgZ</i>     | Transposon insertion in <i>flgZ</i> transformed with pUCP20::His <sub>6</sub> - <i>flgZ</i>                                                                                                                                                                | This study                          |



**Supplementary Tab. 4: Main buffers used in this study**

| Buffer                                |                                                                                                                                          |
|---------------------------------------|------------------------------------------------------------------------------------------------------------------------------------------|
| Lysis Buffer RhIR-P75/P61             | 50 mM Tris pH 8.0, 500 mM NaCl, 5 mM DTT                                                                                                 |
| Lysis Buffer RhIR WT                  | 50 mM Tris-HCl pH 8.0, 500 mM NaCl, 1 mM DTT, 5% glycerol, 50 $\mu$ M mBTL                                                               |
| Lysis Buffer XTEN                     | 50 mM Bicine pH 8.0, 150 mM NaCl, 5% glycerol, 50 $\mu$ M mBTL                                                                           |
| Lysis Buffer PqsE/RhIR-complex        | 50 mM Bicine pH 8.0, 150 mM NaCl, 5% glycerol, 20 $\mu$ M C4-HSL                                                                         |
| Lysis Buffer PqsE/RhIR-complex WB     | 50 mM Bicine pH 8.0, 150 mM NaCl, 50 $\mu$ M C4-HSL                                                                                      |
| Lysis Buffer PqsE E187R               | 50 mM Tris pH 8.0, 150 mM NaCl, 10% glycerol                                                                                             |
| Elution buffer RhIR-P75/P61           | 50 mM Tris-HCl pH 8.0, 500 mM NaCl, 5 mM DTT, 5 mM d-desthiobiotin                                                                       |
| Elution Buffer RhIR WT                | 50 mM Tris-HCl pH 8.0, 500 mM NaCl, 50 $\mu$ M mBTL, 500 mM imidazole                                                                    |
| Elution buffer XTEN                   | 50 mM Bicine pH 8.0, 150 mM NaCl, 5% glycerol, 500 mM Imidazol, 50 $\mu$ M mBTL                                                          |
| Elution buffer PqsE/RhIR-complex      | 50 mM Bicine pH 8.0, 150 mM NaCl, 5% glycerol, 20 $\mu$ M C4-HSL, 500 mM Imidazole                                                       |
| Elution Buffer PqsE E187R             | 50 mM Tris pH 8.0, 150 mM NaCl, 500 mM imidazol, 10% glycerol                                                                            |
| Dialysis buffer RhIR-P75/P61          | 50 mM Tris-HCl pH 8.0, 500 mM NaCl, 5 mM DTT                                                                                             |
| Dialysis Buffer RhIR WT               | 50 mM Tris-HCl pH 8.0, 500 mM NaCl, 50 $\mu$ M mBTL                                                                                      |
| Ion Exchange buffer PqsE/RhIR-complex | Buffer A: 50 mM Bicine pH 8.0, 5% glycerol, 20 $\mu$ M C4-HSL<br>Buffer B: 50 mM Bicine pH 8.0, 1 M NaCl, 5% glycerol, 20 $\mu$ M C4-HSL |
| SEC buffer RhIR-P75/P61               | 50 mM Tris-HCl pH 8.0, 500 mM NaCl, 5 mM DTT, 50 $\mu$ M mBTL                                                                            |
| SEC Buffer RhIR WT                    | 50 mM Tris-HCl pH 8.0, 500 mM NaCl, 50 $\mu$ M mBTL                                                                                      |
| SEC buffer XTEN                       | 50 mM Bicine pH 8.0, 100 mM NaCl, 5% glycerol, 50 $\mu$ M mBTL                                                                           |
| SEC buffer PqsE/RhIR-complex          | 50 mM Bicine pH 8.0, 50 mM NaCl, 5% glycerol, 40 $\mu$ M C4-HSL                                                                          |
| SEC Buffer PqsE E187R                 | 50 mM Tris pH 8.0, 150 mM NaCl, 10% glycerol                                                                                             |

**Supplementary Tab. 5: Antibodies used in this study**

| Antibody                       | Description                                                      | Source                          |
|--------------------------------|------------------------------------------------------------------|---------------------------------|
| $\alpha$ -RhIR                 | anti-RhIR polyclonal rabbit IgG, f.c. 1:33333                    | Dauids Biotechnologie GmbH      |
| $\alpha$ -PqsE                 | anti-PqsE (residues 256-267) polyclonal rabbit IgG, f.c. 1:5000  | BioGenes GmbH                   |
| $\alpha$ -groEL                | anti-groEL polyclonal rabbit IgG, f.c. 1:10000                   | Abcam ab90522, Lot GR3394934-8  |
| $\alpha$ -Rabbit-AP            | anti-rabbit polyclonal goat IgG (Fc), AP-conjugated, f.c. 1:7500 | Promega S3731, Lot 000515550    |
| $\alpha$ -His <sub>6</sub> -AP | anti-His6 monoclonal mouse IgG, AP-conjugated, f.c. 1:1000       | GeneTex GTX44021, Lot 821602997 |

**Supplementary Tab. 6: Crystallization conditions and cryo-protectants used in this study**

|                                         | Temperature | Precipitant                                                                                         | Protein concentration | Cryoprotectant                        |
|-----------------------------------------|-------------|-----------------------------------------------------------------------------------------------------|-----------------------|---------------------------------------|
| <b>RhIR-P75:mBTL</b>                    | 293 K       | 0.1 M Bis-Tris pH 6.5, 0.2 M NaCl, 25 % (w/v) PEG 3350                                              | 3.5 mg/ml             | 10% (v/v) (2R,3R) -(-)-2,3-butanediol |
| <b>RhIR-P75:C4-HSL</b>                  | 293 K       | 0.2 M NaSCN, 20 % (w/v) PEG 3350                                                                    | 3.5 mg/ml             | 10% (v/v) (2R,3R) -(-)-2,3-butanediol |
| <b>RhIR-P61:mBTL</b>                    | 293 K       | 50 mM BICINE pH 8.8, 8.6 % (w/v) PEG 2K, 17.1 % (v/v) PEG MME 350                                   | 3 mg/ml               | 10% (v/v) (2R,3R) -(-)-2,3-butanediol |
| <b>PqsE-XTEN<sub>30</sub>-RhIR:mBTL</b> | 293 K       | 0.1 M NaAcetate pH 4.22, 1.029 M (NH <sub>4</sub> ) <sub>2</sub> HPO <sub>4</sub>                   | 12 mg/ml              | 10% (v/v) (2R,3R) -(-)-2,3-butanediol |
| <b>PqsE/RhIR:C4-HSL</b>                 | 293 K       | 1.1 M (NH <sub>4</sub> ) <sub>2</sub> HPO <sub>4</sub> , 10 mM THPP (pH 7), 100 $\mu$ M C4-HSL      | 6 mg/ml               | 30% (w/v) glycerol                    |
| <b>PqsE/RhIR:mBTL</b>                   | 293 K       | 0.1 M NaAcetate pH 4.91, 0.972 M (NH <sub>4</sub> ) <sub>2</sub> HPO <sub>4</sub> , 10 mM TCEP pH 7 | 10 mg/ml              | 20% (w/v) glycerol                    |
| <b>PqsE-E187R</b>                       | 293 K       | 0.16 M CaAcetate, 0.08 M NaCacodylate pH 6.5, 14.4% PEG 8000, 20% glycerol                          | 7.5 mg/ml             | 10% (v/v) (2R,3R) -(-)-2,3-butanediol |

All crystallization experiments were performed in Intelli-Plates (MiTeGen) with crystallization droplets of 200 nl protein and 200 precipitant solution equilibrated against 75  $\mu$ l reservoirs. PqsE-XTEN<sub>30</sub>-RhIR:mBTL and PqsE/RhIR:C4-HSL were crystallized in MRC Maxi 48-well crystallization plates with 1  $\mu$ l protein and 1  $\mu$ l reservoir or 2  $\mu$ l protein and 2  $\mu$ l reservoir solution equilibrated against 100  $\mu$ l reservoir, respectively.

**Supplementary Tab. 7: Data collection statistics**

|                                                                             | RhIR-P75<br>(mBTL)          | RhIR-P75<br>(C4-HSL)                          | RhIR-P61<br>(mBTL)               | PqsE-XTEN30-RhIR<br>(mBTL)          | PqsE/RhIR complex<br>(mBTL)         | PqsE/RhIR complex<br>(C4-HSL)       | PqsE-E187R                                    |
|-----------------------------------------------------------------------------|-----------------------------|-----------------------------------------------|----------------------------------|-------------------------------------|-------------------------------------|-------------------------------------|-----------------------------------------------|
| PDB entry                                                                   | 7R3G                        | 7R3H                                          | 7R3I                             | 7R3E                                | 7R3J                                | 8B4A                                | 7R3F                                          |
| Space group                                                                 | P6 <sub>1</sub>             | P2 <sub>1</sub> 2 <sub>1</sub> 2 <sub>1</sub> | P4 <sub>1</sub> 2 <sub>1</sub> 2 | I422                                | I422                                | I422                                | P2 <sub>1</sub> 2 <sub>1</sub> 2 <sub>1</sub> |
| Cell dimensions                                                             |                             |                                               |                                  |                                     |                                     |                                     |                                               |
| <i>a</i> , <i>b</i> , <i>c</i> (Å)                                          | 164.75, 164.75,<br>40.3     | 87.98, 91.55,<br>117.37                       | 85.90, 85.90,<br>202.59          | 159.65, 159.65,<br>288.74           | 159.26, 159.26,<br>284.10           | 158.88, 159.88,<br>285.73           | 45.53, 60.17,<br>128.26                       |
| $\alpha$ , $\beta$ , $\gamma$ (°)                                           | 90.0, 90.0, 120.0           | 90.0, 90.0, 90.0                              | 90.0, 90.0, 90.0                 | 90.0, 90.0, 90.0                    | 90.0, 90.0, 90.0                    | 90.0, 90.0, 90.0                    | 90.0, 90.0, 90.0                              |
| Resolution (Å)*                                                             | 47.57-2.15<br>(2.23 - 2.15) | 72.18-3.49<br>(3.62-3.49)                     | 79.16-3.1<br>(3.21 - 3.1)        | 144.38-3.46<br>(3.71-3.46)          | 47.47-3.06<br>(3.33-3.06)           | 142.87-3.06<br>(3.37-3.06)          | 27.68-1.60<br>(1.66-1.60)                     |
| Max. ellipsoidal<br>resolution (Å) <sup>a</sup><br>(direction) <sup>b</sup> |                             |                                               |                                  | 3.46 (a*)<br>3.46 (b*)<br>4.17 (c*) | 3.06 (a*)<br>3.06 (b*)<br>3.97 (c*) | 3.06 (a*)<br>3.06 (b*)<br>3.82 (c*) |                                               |
| <i>R</i> <sub>merge</sub> *                                                 | 0.231 (2.304)               | 0.385 (1.660)                                 | 0.129 (0.846)                    | 0.126 (2.961)                       | 0.184 (2.793)                       | 0.116 (1.590)                       | 0.107 (0.592)                                 |
| <i>R</i> <sub>pim</sub> *                                                   | 0.0399 (0.418)              | 0.0635 (0.318)                                | 0.0148 (0.132)                   | 0.025 (0.563)                       | 0.036 (0.541)                       | 0.037 (0.497)                       | 0.038 (0.316)                                 |
| CC(1/2)*                                                                    | 0.998 (0.711)               | 0.997 (0.785)                                 | 1 (0.946)                        | 0.999 (0.562)                       | 0.999 (0.591)                       | 0.999 (0.630)                       | 0.998 (0.681)                                 |
| <i>I</i> / $\sigma$ ( <i>I</i> )*                                           | 11.1 (1.6)                  | 7.6 (2.1)                                     | 18.5 (2.5)                       | 17.5 (1.5)                          | 17.0 (1.6)                          | 12.8 (1.8)                          | 13.06 (2.22)                                  |
| Completeness                                                                |                             |                                               |                                  |                                     |                                     |                                     |                                               |
| spherical (%)*                                                              | 100 (100)                   | 100 (100)                                     | 100 (100)                        | 79.0 (21.8)                         | 73.8 (24.6)                         | 76.3 (28.0)                         | 99.45 (95.72)                                 |
| ellipsoidal (%)*                                                            |                             |                                               |                                  | 94.8 (58.2)                         | 95.0 (74.2)                         | 94.9 (70.7)                         |                                               |
| Redundancy*                                                                 | 20.1 (19.8)                 | 13.0 (13.7)                                   | 25.5 (27.2)                      | 26.8 (28.4)                         | 27.2 (27.4)                         | 10.7 (11.2)                         | 8.08 (2.80)                                   |

\*Values in parentheses are for highest-resolution shell.

<sup>a</sup>Data were processed anisotropically via STARANISO.

<sup>b</sup>Resolution limits for three directions in reciprocal space (a\*, b\*, c\*).

**Supplementary Tab. 8: Refinement statistics**

| PDB entry           | RhIR-P75<br>(mBTL)<br>7R3G  | RhIR-P75<br>(C4-HSL)<br>7R3H | RhIR-P61<br>(mBTL)<br>7R3I | PqsE-XTEN30-RhIR<br>(mBTL)<br>7R3E | PqsE/RhIR complex<br>(mBTL)<br>7R3J | PqsE/RhIR complex<br>(C4-HSL)<br>8B4A | PqsE-E187R<br>7R3F            |
|---------------------|-----------------------------|------------------------------|----------------------------|------------------------------------|-------------------------------------|---------------------------------------|-------------------------------|
| Resolution (Å)*     | 47.57-2.15<br>(2.22 - 2.15) | 49.4-3.49<br>(3.62 - 3.49)   | 43.63-3.1<br>(3.21 - 3.1)  | 53.54-3.46<br>(3.71 - 3.46)        | 47.47 - 3.06<br>(3.17 - 3.064)      | 56.52-3.06<br>(3.18-3.06)             | 29.29 - 1.65<br>(1.71 - 1.65) |
| No. reflections     | 34603                       | 12536                        | 14454                      | 19554 (ellipsoidal)                | 25592 (ellipsoidal)                 | 26936 (ellipsoidal)                   | 43230                         |
| R <sub>work</sub> * | 0.199 (0.264)               | 0.223 (0.262)                | 0.248 (0.296)              | 0.228 (0.363)                      | 0.269 (0.460)                       | 0.258 (0.414)                         | 0.206 (0.266)                 |
| R <sub>free</sub> * | 0.230 (0.307)               | 0.270 (0.347)                | 0.272 (0.346)              | 0.243 (0.405)                      | 0.289 (0.475)                       | 0.278 (0.425)                         | 0.263 (0.291)                 |
| No. atoms           |                             |                              |                            |                                    |                                     |                                       |                               |
| Protein             | 3780                        | 7278                         | 3577                       | 8610                               | 8623                                | 8598                                  | 2339                          |
| Ligand/ion          | 72                          | 50                           | 72                         | 76                                 | 76                                  | 28                                    | 21                            |
| Water               | 136                         | 0                            | 0                          | 3                                  | 23                                  | 14                                    | 264                           |
| B-factors           |                             |                              |                            |                                    |                                     |                                       |                               |
| Protein             | 46.70                       | 78.47                        | 93.77                      | 175.07                             | 112.63                              | 121.85                                | 16.26                         |
| Ligand/ion          | 33.46                       | 97.95                        | 76.29                      | 163.11                             | 102.93                              | 103.32                                | 20.06                         |
| Water               | 44.32                       | 0                            | 0                          | 178.51                             | 90.71                               | 109.46                                | 24.49                         |
| R.m.s. deviations   |                             |                              |                            |                                    |                                     |                                       |                               |
| Bond lengths (Å)    | 0.003                       | 0.002                        | 0.002                      | 0.003                              | 0.003                               | 0.002                                 | 0.005                         |
| Bond angles (°)     | 0.605                       | 0.487                        | 0.516                      | 0.670                              | 0.613                               | 0.509                                 | 0.740                         |
| Ramachandran        |                             |                              |                            |                                    |                                     |                                       |                               |
| favored (%)         | 97.65                       | 92.91                        | 94.86                      | 95.07                              | 95.08                               | 94.24                                 | 96.92                         |
| allowed (%)         | 1.92                        | 6.23                         | 4.71                       | 4.47                               | 4.27                                | 5.11                                  | 3.08                          |
| outlier (%)         | 0.77                        | 0.86                         | 0.43                       | 0.47                               | 0.65                                | 0.65                                  | 0.00                          |

\*Values in parentheses are for highest-resolution shell.

**Supplementary Tab. 9: Synthetic *P. aeruginosa* PA14/PAO1 RhlR 21-mer peptides for SPOT array (Supplementary Fig. 3a)**

| Position | A*                    | B                     | C                      | D                     |
|----------|-----------------------|-----------------------|------------------------|-----------------------|
| 1        | MRNDGGFLLWWDGLRSEMQPI | QMQNYGAVDPAILNGLRSSEM | SFEREEIRLRLRCMIELLTQK  | KNIQKKFDAPNKTLAAAYAAA |
| 2        | DGGFLLWWDGLRSEMQPIHDS | NYGAVDPAILNGLRSSEMVVW | REEIRLRLRCMIELLTQKLT   | QKKFDAPNKTLAAAYAAALGL |
| 3        | FLLWWDGLRSEMQPIHDSQGV | AVDPAILNGLRSSEMVVWSDS | IRLRLRCMIELLTQKLTDEH   | KKFDAPNKTLAAAYAAALGLI |
| 4        | WWDGLRSEMQPIHDSQGVFAV | PAILNGLRSSEMVVWSDSLFD | RLRCMIELLTQKLTDEHPML   |                       |
| 5        | GLRSEMQPIHDSQGVFAVLEK | LNGLRSSEMVVWSDSLFDQSR | CMIELLTQKLTDEHPMLMSN   |                       |
| 6        | SEMQPIHDSQGVFAVLEKEVR | LRSEMVVWSDSLFDQSRMLW  | ELLTQKLTDEHPMLMSNPVC   |                       |
| 7        | QPIHDSQGVFAVLEKEVRRLG | SEMVVWSDSLFDQSRMLWNEA | TQKLTDEHPMLMSNPVCLSH   |                       |
| 8        | HDSQGVFAVLEKEVRRLGFDY | VVWSDSLFDQSRMLWNEARDW | LTDLEHPMLMSNPVCLSHRER  |                       |
| 9        | QGVFAVLEKEVRRLGFDYYAY | SDSLFDQSRMLWNEARDWGLC | LEHPMLMSNPVCLSHREREIL  |                       |
| 10       | FAVLEKEVRRLGFDYYAYGVR | LFQSRMLWNEARDWGLCVGA  | PMLMSNPVCLSHREREILQWT  |                       |
| 11       | LEKEVRRLGFDYYAYGVRHTI | QSRMLWNEARDWGLCVGATLP | MSNPVCLSHREREILQWTADG  |                       |
| 12       | EVRRLGFDYYAYGVRHTIPFT | MLWNEARDWGLCVGATLPIRA | PVCLSHREREILQWTADGKSS  |                       |
| 13       | RLGFDYYAYGVRHTIPFTRPK | NEARDWGLCVGATLPIRAPNN | LSHREREILQWTADGKSSGEI  |                       |
| 14       | FDYYAYGVRHTIPFTRPKTEV | RDWGLCVGATLPIRAPNNLLS | REEREILQWTADGKSSGEIAII |                       |
| 15       | YAYGVRHTIPFTRPKTEVHGT | GLCVGATLPIRAPNNLLSVLS | EILQWTADGKSSGEIAIILSI  |                       |
| 16       | GVRHTIPFTRPKTEVHGTYPK | VGATLPIRAPNNLLSVLSVAR | QWTADGKSSGEIAIILSISES  |                       |
| 17       | HTIPFTRPKTEVHGTYPKAWL | TLPIRAPNNLLSVLSVARDQQ | ADGKSSGEIAIILSISESTVN  |                       |
| 18       | PFTRPKTEVHGTYPKAWLERY | IRAPNNLLSVLSVARDQQNIS | KSSGEIAIILSISESTVNFHH  |                       |
| 19       | RPKTEVHGTYPKAWLERYQMQ | PNNLLSVLSVARDQQNISSFE | GEIAIILSISESTVNFHHKNI  |                       |
| 20       | TEVHGTYPKAWLERYQMNYG  | LLSVLSVARDQQNISSFERE  | AIILSISESTVNFHHKNIQKK  |                       |
| 21       | HGTYPKAWLERYQMNYGAVD  | VLSVARDQQNISSFEREIRL  | LSISESTVNFHHKNIQKKFDA  |                       |
| 22       | YPKAWLERYQMNYGAVDPAI  | VARDQQNISSFEREIRLRLR  | SESTVNFHHKNIQKKFDAPNK  |                       |
| 23       | AWLERYQMNYGAVDPAIING  | DQQNISSFEREIRLRLRCMI  | TVNFHHKNIQKKFDAPNKTLA  |                       |
| 24       | ERYQMNYGAVDPAIINGLRS  | NISSFEREIRLRLRCMIELL  | FHHKNIQKKFDAPNKTLAAAY  |                       |

\*Peptide A1 starts with residue 1 of RhlR, peptide D3 ends with the C-terminal residue 241. Note that the sequences of RhlR from the commonly used laboratory strains *P. aeruginosa* PA14 and PAO1 are identical (UniProt entries A0A0H2ZEG8 & P54292).

Supplementary Figure 1a

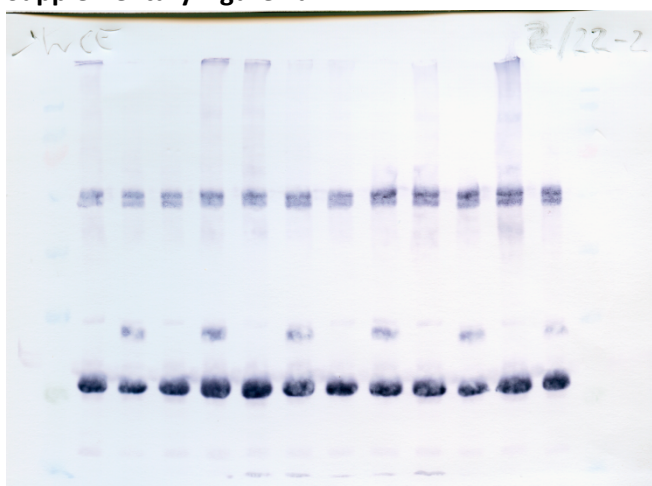

Supplementary Figure 2a

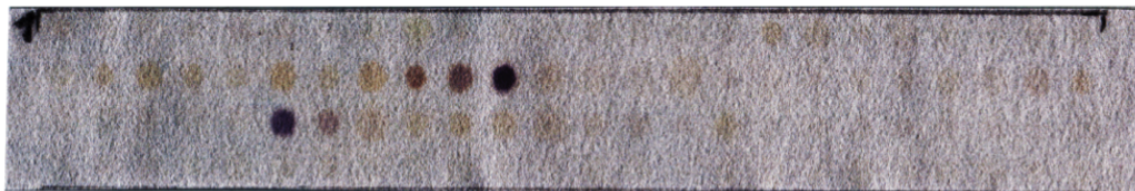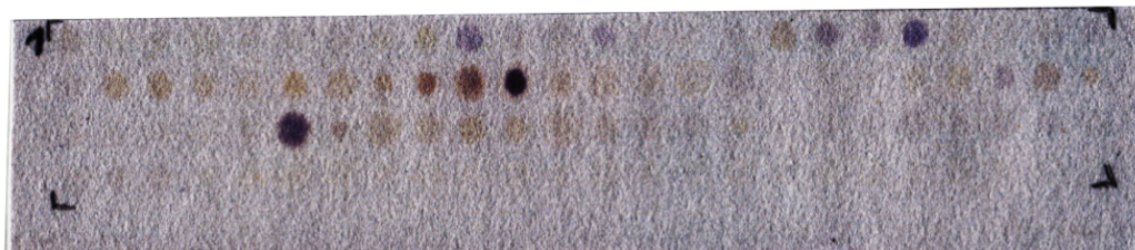

Supplementary Fig. 5d

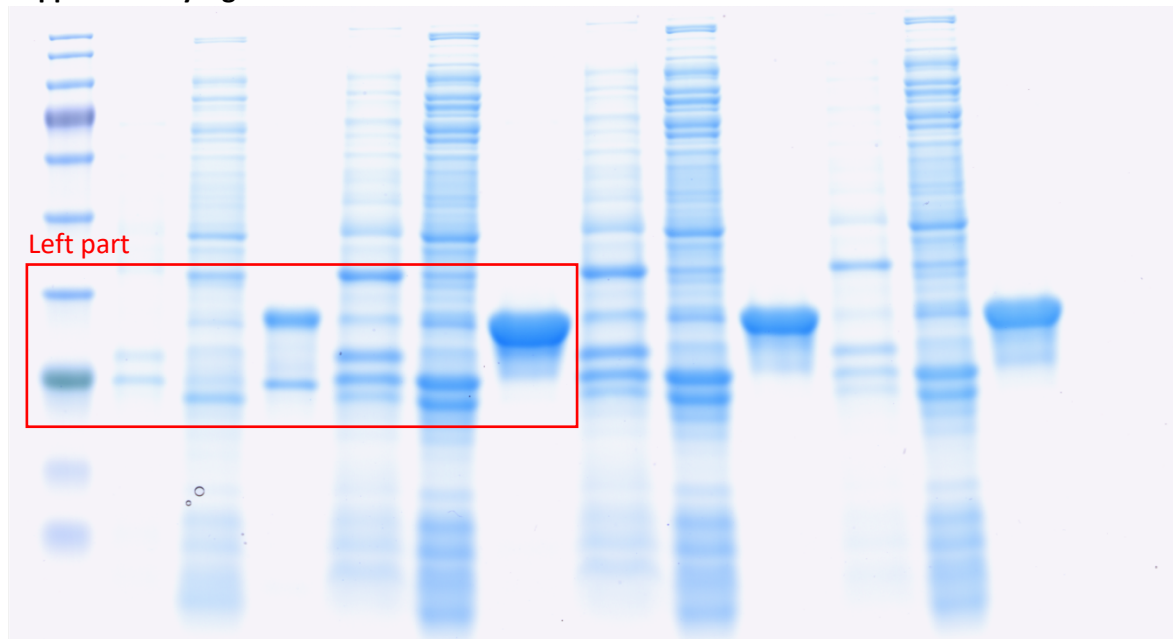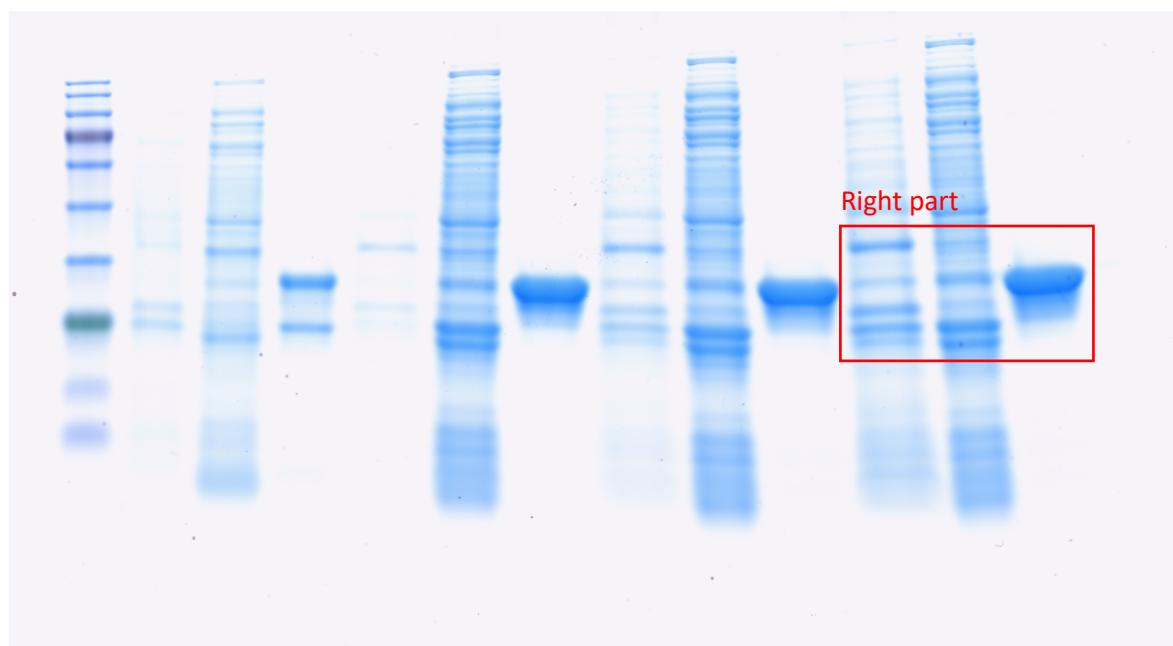

Supplement: 41467_2022_35030_MOESM1_ESM.pdf [file 41467_2022_35030_MOESM1_ESM.pdf]
